# Supplementary material for: Core–shell magnetic mesoporous 3-aminophenol–formaldehyde resin microspheres with rich functional groups via interface co-assembly and polymerization
Source: Royal Society of Chemistry journal article supplement (doi:10.1039/d4ta04277h), 2024-01-01
Supplement: d4ta04277h1.pdf [file d4ta04277h1.pdf]

## Supporting Information

### **Core-shell Magnetic Mesoporous 3-Aminophenol-Formaldehyde Resin Microspheres with Rich Functional Groups via Interface Co-assembly and Polymerization**

Jiarong Li,<sup>a</sup> Shude Liu,<sup>a</sup> Yuanzhao Xie,<sup>a</sup> Fengluan Jiang,<sup>a</sup> Xinyu Huang,<sup>a</sup> Jianfeng Xia<sup>\*b</sup>, Limin Wu<sup>\*c</sup> and Yonghui Deng<sup>\*a</sup>

<sup>a</sup> Department of Chemistry, State Key Laboratory of Molecular Engineering of Polymers, Shanghai Key Laboratory of Molecular Catalysis and Innovative Materials, State Key Lab of Transducer Technology, iChEM, Fudan University, Shanghai 200433, P. R. China

<sup>b</sup> Zhejiang Fulai New Materials, Co. Ltd., Zhejiang Province 314103, P. R. China

<sup>c</sup> Institute of Energy and Materials Chemistry, Inner Mongolia University, Hohhot 010021, P. R. China

\*Corresponding authors

E-mail: yhdeng@fudan.edu.cn (Y.H. Deng); jianfengxia@alleadprint.com (J.F. Xia); wlm@imu.edu.cn (L.M. Wu).

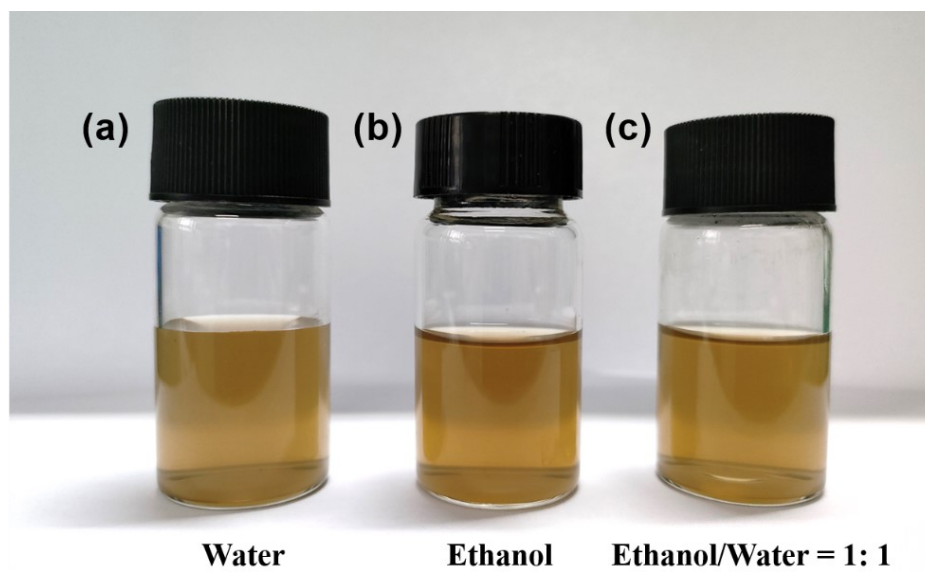

**Fig. S1** Optical images of Fe<sub>3</sub>O<sub>4</sub> particles dispersed in water (a), ethanol (b), and their mixed solutions(c), respectively.

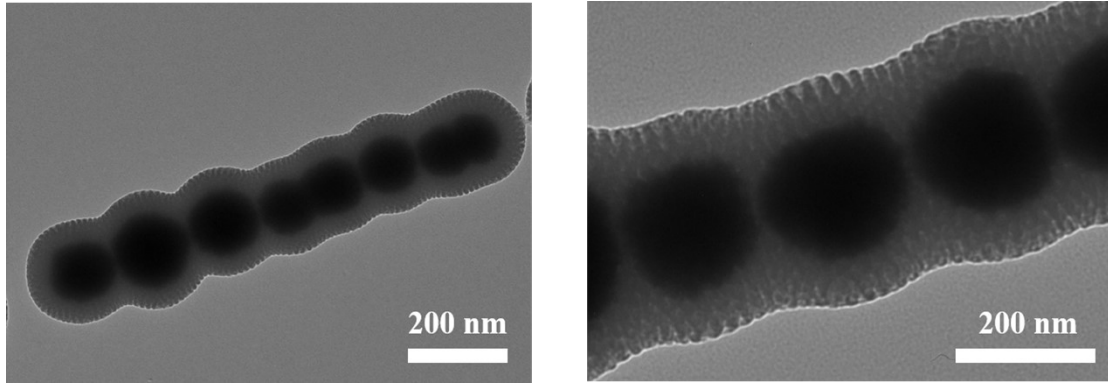

**Fig. S2** TEM images of MMAPF nanochains (a) and the enlarged image (b).

MMAPF nanochains were synthesized by introducing an applied magnetic field into the interface coating of the phenolic resin. In a typical synthesis, 3.5 g of F127, 3.5 mL of TMB, 1.4 g of 3-aminophenol, 1.75 mL of formaldehyde, and 50  $\mu$ L of EDA were added into the ethanol/water mixed solution in sequence under continuous stirring. Then the solution was placed in a static magnetic field of 28.5 mT for 90 seconds to induce the alignment of  $\text{Fe}_3\text{O}_4$  particles. After standing for 4 hours, ethanol extraction was performed to remove F127 and TMB, and finally MMAPF nanochains were obtained.

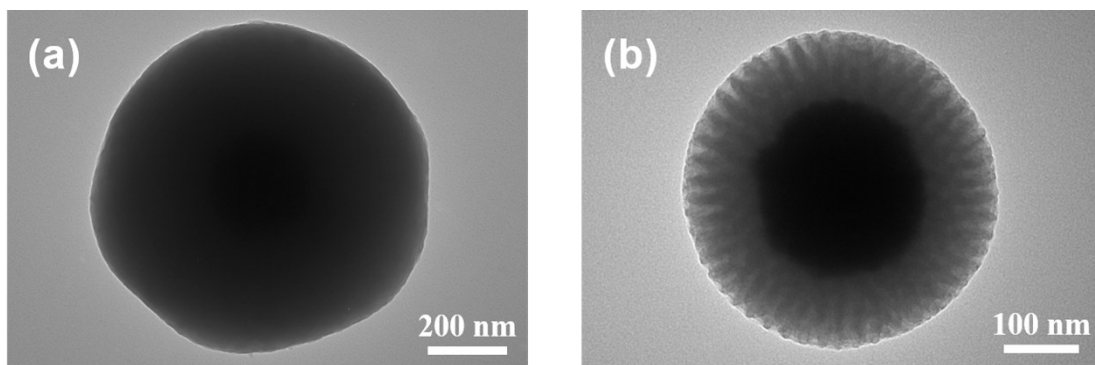

**Fig. S3** TEM images of magnetic aminophenol-formaldehyde resin microspheres synthesized without using F127 (a) and using 3.5 g of F127 (b).

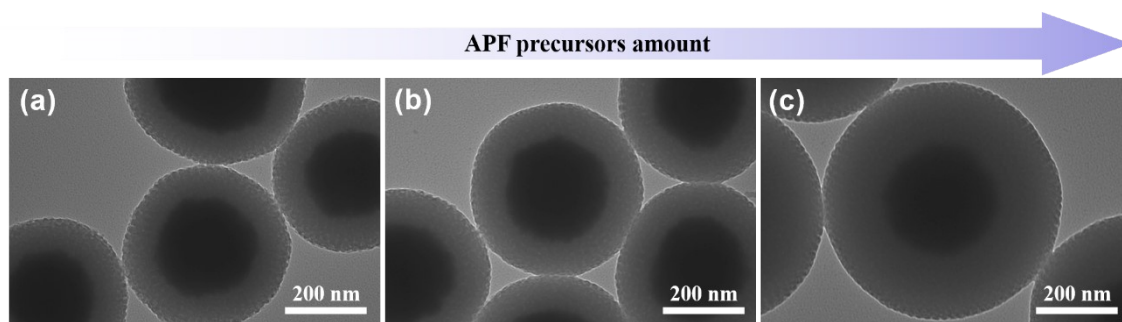

**Fig. S4** TEM images of MMAPF microspheres synthesized with different amounts of 3-aminophenol and formaldehyde: (a) 0.7 g and 0.8 mL, (b) 1.4 g and 1.75 mL, (c) 2.8 g and 3.5 mL.

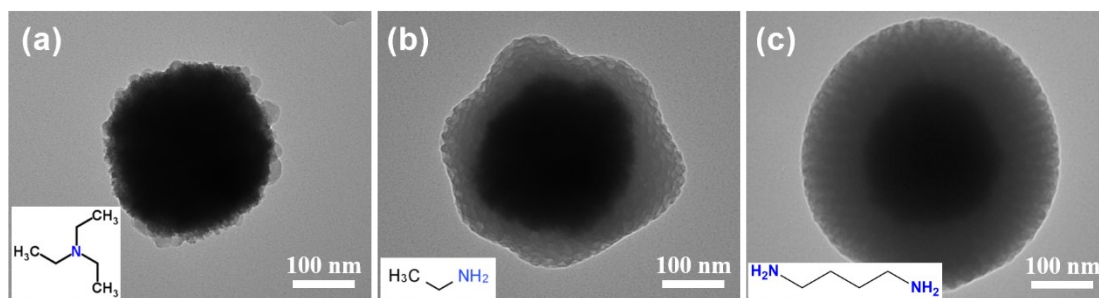

**Fig. S5** TEM images of magnetic aminophenol-formaldehyde resin microspheres synthesized using different organic amines (a) triethylamine, (b) ethylamine, and (c) 1,4-diaminobutane.

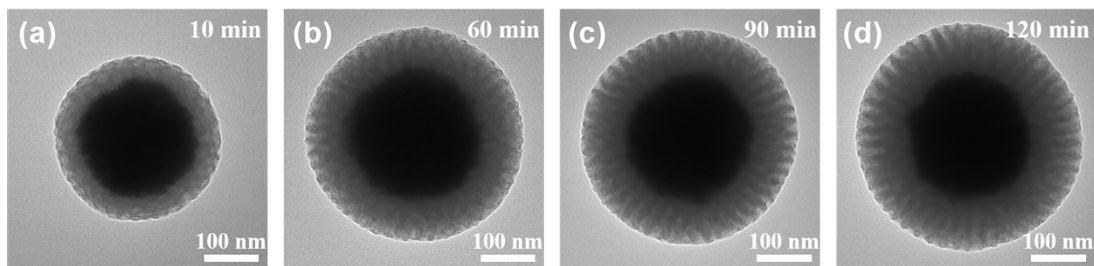

**Fig. S6** TEM images of MMAPF microspheres obtained at different reaction intervals during the synthesis: (a) 10, (b) 60, (c) 90, and (d) 120 min.

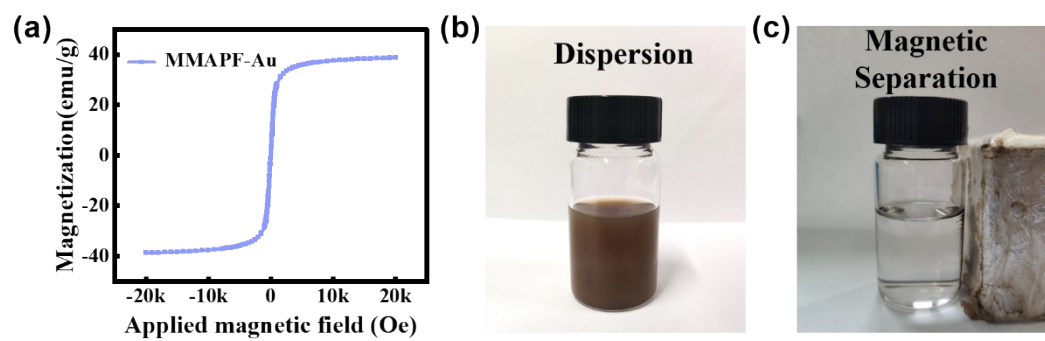

**Fig. S7** Magnetic hysteresis loop of MMAPF-Au (a) and the optical images (b-c) of the aqueous dispersion (ca. 1.5wt%) of MMAPF-Au before and after 1 min. separation with a magnet (200 mT).



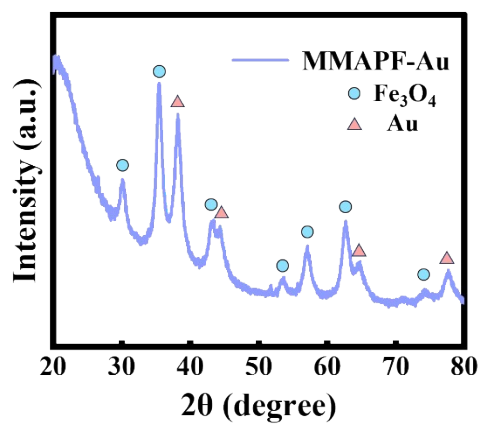

**Fig. S8** XRD pattern of MMAPF-Au, indicating the presence of both magnetite and metallic gold components.

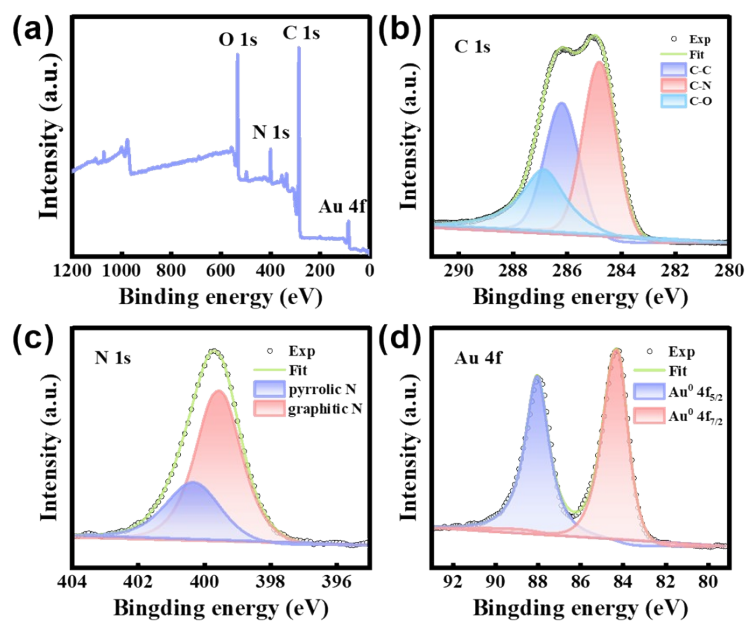

**Fig. S9** XPS survey spectra and high resolution XPS spectra of C 1s (a), N 1s (b), O 1s (c), and Au 4f (d) for MMAPF-Au.

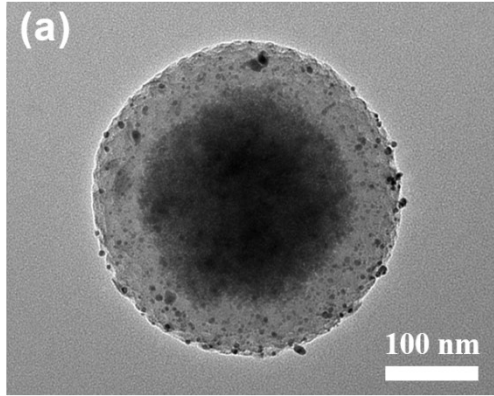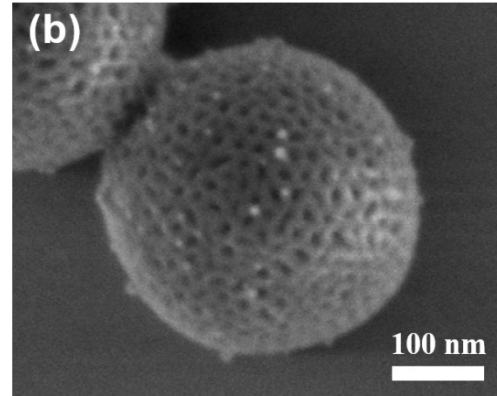

**Fig. S10** TEM (a) and SEM (b) images of the recycled MMAPF-Au microspheres.

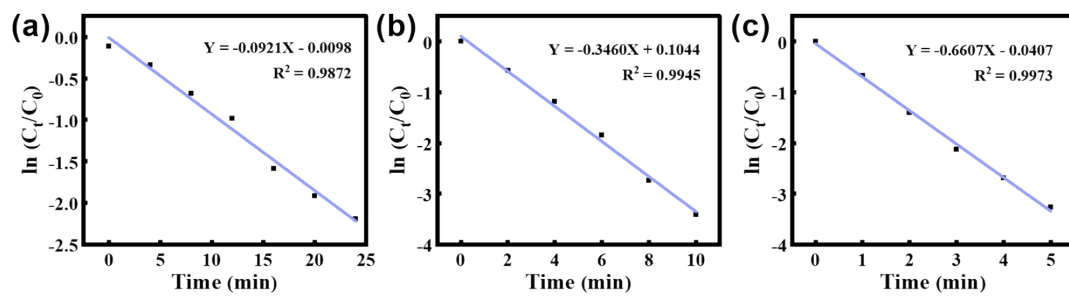

**Fig. S11** The pseudo-first-order rate plot curve of the reaction under different amount of MMAPF-Au catalysts: (a) 0.2, (b) 0.6, and (c) 1.4 mg.

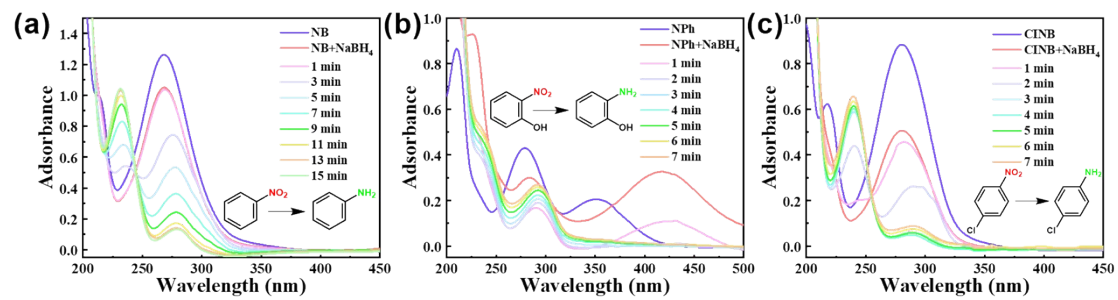

**Fig. S12** UV-vis absorption spectra of the reduction of various nitroaromatic compounds to the corresponding aminoarenes in the presence of MMAPF-Au catalysts.

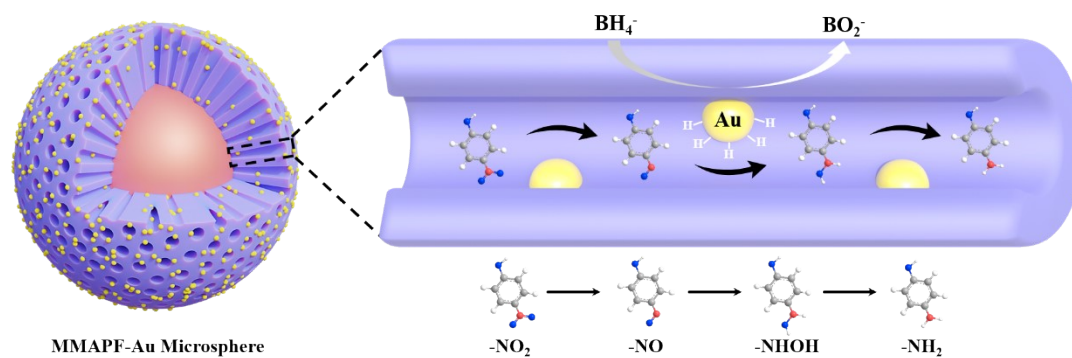

**Fig. S13** Schematic illustration of the reaction mechanism for 4-NP hydrogenation reaction over MMAPF-Au catalyst.

**Table S1** The results of 4-NP reduction under different amount of MMAPF-Au catalysts.

| <b>Catalyst<br/>(mg)</b> | <b>Reducing<br/>Agent</b> | <b>Solvent</b>   | <b>Temperatur<br/>e (°C)</b> | <b>Time<br/>(min)</b> | <b>Conversion<br/>(%)</b> |
|--------------------------|---------------------------|------------------|------------------------------|-----------------------|---------------------------|
| 0.2                      | NaBH <sub>4</sub>         | H <sub>2</sub> O | 25                           | 25                    | 88                        |
| 0.6                      | NaBH <sub>4</sub>         | H <sub>2</sub> O | 25                           | 10                    | 99                        |
| 1.0                      | NaBH <sub>4</sub>         | H <sub>2</sub> O | 25                           | 6                     | 99                        |
| 1.4                      | NaBH <sub>4</sub>         | H <sub>2</sub> O | 25                           | 5                     | 99                        |

**Table S2** Efficiency of MMAPF-Au catalysts in the reduction of various nitroaromatic compounds.

| Substrate                                                                         | Product                                                                           | Catalyst (mg) | Reducing Agent    | Solvent                          | Time (min) | Conversion (%) |
|-----------------------------------------------------------------------------------|-----------------------------------------------------------------------------------|---------------|-------------------|----------------------------------|------------|----------------|
| 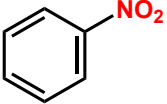 |  | 1.0           | NaBH <sub>4</sub> | C <sub>2</sub> H <sub>5</sub> OH | 15         | 87             |
|  |  | 1.0           | NaBH <sub>4</sub> | C <sub>2</sub> H <sub>5</sub> OH | 7          | 98             |
|  |  | 1.0           | NaBH <sub>4</sub> | C <sub>2</sub> H <sub>5</sub> OH | 7          | 84             |
